# Supplementary material for: Identification of Subtype-Specific Three-Gene Signature for Prognostic Prediction in Diffuse Type Gastric Cancer
Source: Front Oncol. 2019 Nov 12;9:1243. doi: 10.3389/fonc.2019.01243 (PMC6869510; doi:10.3389/fonc.2019.01243)
Supplement: Supplementary file 5 [file Table_5.XLSX]

## Sheet: Sheet1
Table S5 The AIC calculatiion of candidate genes in intestinal type
GENE	Df	AIC
None		450.51
-DHCR7	1	454.03
-PDZK1IP1	1	454.3
-PLEKHS1	1	456.28
-CDCA3	1	458.23
KLK6	1	459.06
