# Supplementary material for: Identification of Subtype-Specific Three-Gene Signature for Prognostic Prediction in Diffuse Type Gastric Cancer
Source: Front Oncol. 2019 Nov 12;9:1243. doi: 10.3389/fonc.2019.01243 (PMC6869510; doi:10.3389/fonc.2019.01243)
Supplement: Supplementary file 7 [file Table_7.XLSX]

## Sheet: Sheet1
Table S7 The univariate and multivariate Cox regression analysis between RS and other clinical characteristics and OS in intestinal type GC
Variate COX					Multivariate COX
	coef	HR	P		coef	HR	P
Sex	0.380026	1.46232	0.281493
Age	0.0390079	1.03978	0.0188208	*	0.760323	2.13897	0.0106493	**
T	0.723267	2.06116	<0.001	***	0.44685	1.56339	0.020444	*
N	0.506111	1.65883	0.000642585	***	0.44671	1.56317	0.006304	**
M	1.08646	2.96376	0.0375402	*
RS	-1.44636	0.235426	<0.001	***	-1.2019	0.30062	0.000508	***
P<0.001 *** , P<0.01 ** , P<0.05 * .
